# Supplementary material
Source: Springer Nature journal article supplement (https://www.springermedizin.de/resource/supplementary/12889_2011_4344_MOESM4_ESM.pdf/9491672)

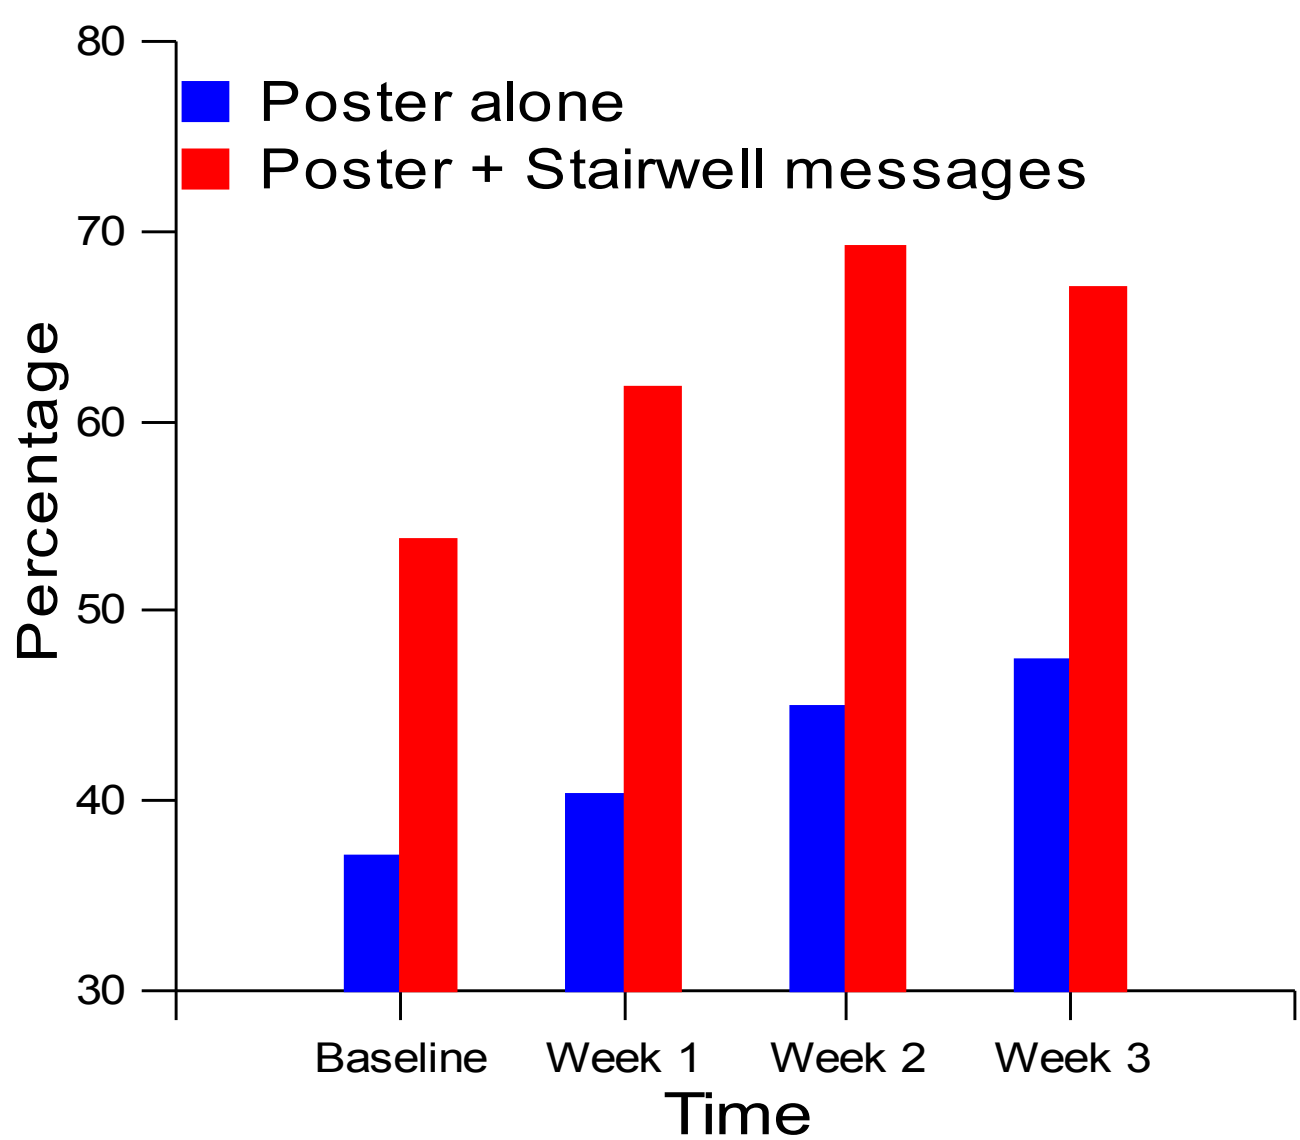

Supplement: MOESM4 [file 9491672]
